# Supplementary material
Source: Springer Nature journal article supplement (https://www.springermedizin.de/resource/supplementary/12911_2010_348_MOESM3_ESM.pdf/9525534)
Supplement: MOESM3 [file 9525534]

$$P_{21121 \times 1} = 0.000000 < 0.05 \div 21 = 0.002381 \longrightarrow \text{T3}$$

$$P_{12212 \times 3} = 0.000058 < 0.05 \div 20 = 0.002500 \longrightarrow \text{T1}$$

$$P_{12213 \times 3} = 0.000060 < 0.05 \div 19 = 0.002632 \longrightarrow \text{T2}$$

$$P_{22221 \times 1} = 0.000080 < 0.05 \div 18 = 0.002778 \longrightarrow \text{T4}$$

$$P_{22213 \times 3} = 0.004507 > 0.05 \div 17 = 0.002941$$
